# Supplementary material for: Autistic Children Quickly Orient Away from Both Eyes and Mouths During Face Observation
Source: Springer Nature journal article supplement (doi:10.1007/s10803-021-05378-x), 2022-02-09
Supplement: MOESM1 [file 20119698]

## Supplementary Materials

*Effects of emotion on the latency to look away.* A main effect of emotion was found,  $\chi^2 = 8.52$ ,  $p = .036$ . Pairwise follow-up comparisons were conducted with a Bonferroni-adjusted alpha level of .008 (correcting for six comparisons). As can be seen in *Table S1*, the only significant effect was a longer latency to look away from the cued region when the face showed a happy as compared to a neutral expression.

*Table S1. Pairwise follow-up comparisons of the effects of facial stimuli emotion on latency to look away.*

| Effect            | $\chi^2$ | p             | b     | SE    | d    |
|-------------------|----------|---------------|-------|-------|------|
| Angry > Fearful   | 0.92     | .3380         | 32.30 | 33.69 | 0.06 |
| Angry > Happy     | 2.97     | .0850         | 58.59 | 33.96 | 0.12 |
| Neutral > Angry   | 1.10     | .2939         | 39.95 | 38.03 | 0.07 |
| Fearful > Happy   | 0.90     | .3427         | 30.05 | 31.66 | 0.07 |
| Neutral > Happy   | 7.22     | <b>.0072*</b> | 95.57 | 35.46 | 0.19 |
| Neutral > Fearful | 3.66     | .0556         | 69.05 | 36.02 | 0.12 |

*Interaction effect between emotion and AOI on the latency to look away.* Effects of AOI (latency from mouth – latency from eyes) for the different emotions are shown in *Figure S1*. Error bars cover estimated marginal means covered by 95% confidence intervals. As can be seen, participants were quicker to orient from the mouth than from the eyes for all emotions except happiness, resulting in an interaction effect between emotion and AOI ( $\chi^2 = 11.07$ ,  $p = .011$ ).

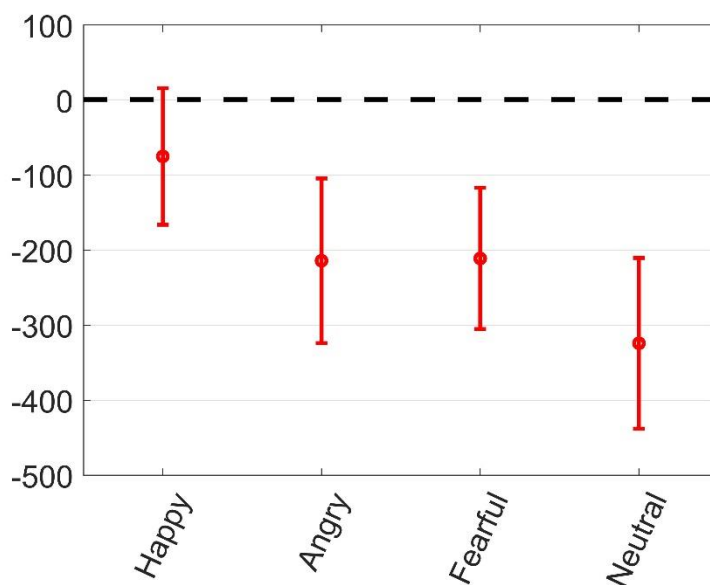

*Figure S1.* Effects of AOI (latency from mouth – latency from eyes) for the different emotions across groups. Error bars cover estimated marginal means covered by 95% confidence intervals.
